# Supplementary material for: Genome-scale metabolic modeling of Aspergillus fumigatus strains reveals growth dependencies on the lung microbiome
Source: PubMed Central journal article supplement (PMC10359302; doi:10.1038/s41467-023-39982-5), 2023-07-20
Supplement: 41467_2023_39982_MOESM3_ESM.pdf [file 41467_2023_39982_MOESM3_ESM.pdf]

## Description of Additional Supplementary Data Files

File name: Supplementary Data S1

Description: Biomass composition

File name: Supplementary Data S2

Description: Details on phenotypic growth assays, gene essentiality data and quantitative predictability

File name: Supplementary Data S3

Description: *A. fumigatus* strain metadata

File name: Supplementary Data S4

Description: Details on experimental data including metabolomics, radial growth and metabolic activity

File name: Supplementary Data S5

Description: Machine learning model using minimal media

File name: Supplementary Data S6

Description: Metagenomics of cystic fibrosis samples

File name: Supplementary Data S7

Description: Metadata of clinical cystic fibrosis samples

File name: Supplementary Data S8

Description: Metabolite analysis using MAMBO

File name: Supplementary Data S9

Description: Detailed GEM information

File name: Supplementary Data S10

Description: Constraint details corresponding to specific *in silico* simulations
